# Supplementary material for: DNA-Binding Properties of YbaB, a Putative Nucleoid-Associated Protein From Caulobacter crescentus
Source: PubMed Central journal article supplement (PMC8581549; doi:10.3389/fmicb.2021.733344), 2021-10-28
Supplement: Data_Sheet_1.pdf [file Data_Sheet_1.pdf]

## **Supplementary Data**

**DNA binding properties of YbaB, a putative nucleoid associated protein from *Caulobacter crescentus*.**

**Parul Pal<sup>1</sup>, Malvika Modi<sup>1</sup>, Shashank Ravichandran<sup>2</sup>, Ragothaman M Yennamalli<sup>2</sup> and Richa Priyadarshini<sup>1\*</sup>**

<sup>1</sup> Department of Life Sciences, School of Natural Sciences, Shiv Nadar University, Gautam Buddha Nagar, Uttar Pradesh, India

<sup>2</sup> Department of Bioinformatics, School of Chemical and Biotechnology, SASTRA Deemed to be University, Thanjavur, Tamil Nadu, India

ORCID:

Richa Priyadarshini: 0000-0002-8613-9438

Ragothaman M. Yennamalli: 0000-0002-3327-1582

\* Corresponding author

**Correspondence and reprints:**

**Dr. Richa Priyadarshini**

Department of Life Sciences, School of Natural Sciences, Shiv Nadar University, Gautam Buddha Nagar, Uttar Pradesh, India.

Ph no: +91-120-3819100 Ext. 220

Email: [richa.priyadarshini@snu.edu.in](mailto:richa.priyadarshini@snu.edu.in) (RP)

## Plasmid Construction

**pPAL1:** *ybab<sub>cc</sub>* was amplified using primers Fwd: 5'-CCCCCGGTACCAGGAGGATGAAAGACCTCGGCGGCC-3' and Rev: 5'-CCCCCCTGCAGTTAGAACTTCATCCCGGGCAG-3'. The resulting fragment was ligated with vector pJS14 equally treated with KpnI and PstI.

**pPAL2:** *ybab<sub>cc</sub>* was amplified using primers Fwd: 5'-CCCCCGGTACCATGAAAGACCTCGGCGGCC-3' and Rev: 5'-CCCCCGCTAGCTTAGAACTTCATCCCGGGCAG-3'. The resulting fragment was ligated with vector pXCFPN-5, equally treated with KpnI and NheI.

**pPAL3:** *ybab<sub>cc</sub>* gene was amplified using primers Fwd: 5'-CCCCCGGATCCATGAAAGACCTCGGCGGCC-3' and Rev: 5'-CCCCCGAGCTCTTAGAACTTCATCCCGGGCAG-3'. The resulting fragment was ligated into vector pET28b, equally treated with SacI and BamHI.

**pPAL4:** *ybab<sub>cc</sub>* was amplified using primers Fwd: 5'-CCCCCATATGATGAAAGACCTCGGCGGCC-3' and Rev: 5'-CCCCCGGTACCTTAGAACTTCATCCCGGGCAG-3'. The resulting fragment was ligated with vector pJS14, equally treated with NdeI and KpnI.

**pPAL5:** truncated *ybab<sub>cc</sub>* gene was amplified using primers Fwd: 5'-CCCCCGGATCCATGAAAGACCTCGGCGGCC-3' and Rev: 5'-CCCCCGAGCTCATGACCTCGCCCTCGCCGGG-3'. The resulting fragment was ligated into vector pET28b, equally treated with SacI and BamHI.

## **Strain Construction**

**RP40:** *E. coli* wild type strain MG1655 was transformed with pPAL1 recombinant vector.

**RP41:** BL21 (DE3) pLysS was transformed with pPAL3 recombinant vector.

**RP42:** S17-1 carrying pPAL2 was mated with CB15N

**RP43:** S17-1 carrying pPAL4 was mated with CB15N

**RP44:** BL21 (DE3) pLysS was transformed with pPAL5 recombinant vector.

**RP45:** *C. crescentus ftsI(ts)* was transduced with RP42 lysate

**RP46:** *E. coli* wild type strain MG1655 was transformed with empty pBAD18 vector.

## **Figure legends**

**Figure S1. YbaB<sub>Cc</sub> localization in wildtype CB15N.** RP42 cells (CB15N *xylX*:: pPAL2) carrying CFP-fused YbaB<sub>Cc</sub> under the control of *P<sub>xyl</sub>* promoter were cultured at 30°C in PYE medium till 0.1 OD and then induced with 0.3% xylose. Samples were taken at multiple time points (4h,6h,8h,10h,12h) and imaged on agarose-padded glass slides. The figure shows images from 4h sample. At all time-points, YbaB<sub>Cc</sub> was found to be dispersed throughout the cell length. The scale bar represents 5µM.

**Figure S2. The Electrostatic surface of YbaB<sub>Cc</sub> protein** (shown here in surface representation) has a patch of positively charged surface (colored blue) that is most likely to interact with DNA. The sequence range is from Arg51 to Ile71. Image made using APBS and PyMOL.

**Figure S3: Confirmation of purified YbaB<sub>Cc</sub> protein.** RP41 cells were used to overexpress YbaB<sub>Cc</sub> protein via IPTG induction to carry out purification of the full length YbaB<sub>Cc</sub> protein. (A) Coomassie stained SDS-PAGE gel showing overexpression of YbaB<sub>Cc</sub> from pet28b plasmid. Lane 1 carries protein ladder. Protein band (13kDa, arrow) is present in sample lanes: Whole cell lysate (lane 2), Pellet fraction (lane 3), Supernatant fraction (lane 4), lanes 5 and 6 are flowthrough and wash buffer samples collected from protein purification process and lanes 7-9 show elution fractions carrying purified protein. (B) Western Blot showing 13kDa band corresponding to YbaB<sub>Cc</sub>. (C) Dot Blot of purified YbaB<sub>Cc</sub>. 5 µl each of concentrated purified YbaB<sub>Cc</sub>, 1:5, 1:10 dilutions of the protein and Anti-his antibody (control) were spotted onto a nitrocellulose membrane and probed with anti-his antibody.

**Figure S4: Confirmation of purified truncated YbaB<sub>Cc</sub> protein.** Western Blot showing 11kDa band from whole cell lysate (WCL), pellet, supernatant and elution fractions.
